# Supplementary material for: Enrichment of lung microbiome with supraglottic taxa is associated with increased pulmonary inflammation
Source: Springer Nature journal article supplement (doi:10.1186/2049-2618-1-19), 2013-07-01

Figure S3

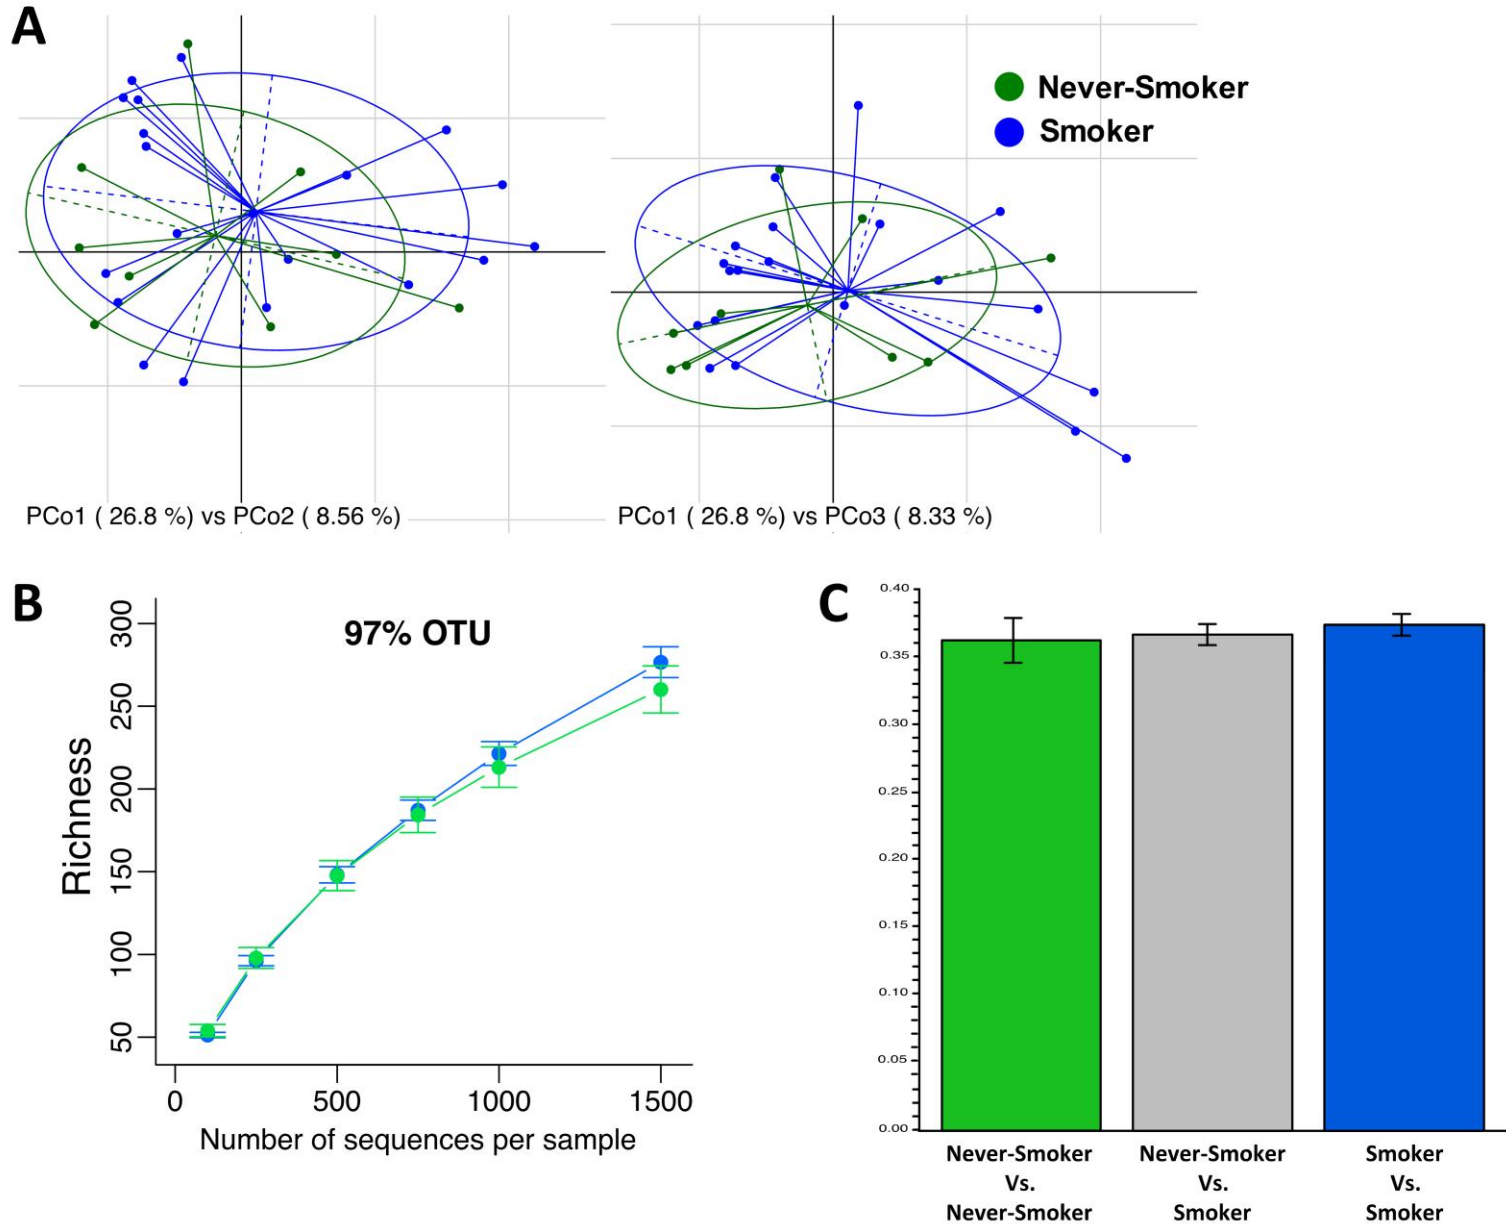

Supplement: 40168_2013_18_MOESM4_ESM.pdf [file 40168_2013_18_MOESM4_ESM.pdf]
